# Supplementary material for: Flammability of Thick but Thermally Thin Materials including Bio-Based Materials
Source: MDPI journal article supplement (doi:10.3390/molecules28135175), 2023-07-03
Supplement: s1 [file s1]

| Sample   | Mass (g) | Heat flux<br>(kW/m <sup>2</sup> ) | Grid<br>(1=yes) | Heat of<br>combustion<br>(kJ/g) | fo | Absorbing<br>mass (g) | Alpha  | Beta   | Predicted<br>pHRR<br>(kW/m <sup>2</sup> ) | Exp.<br>pHRR<br>(kW/m <sup>2</sup> ) | Error<br>(kW/m <sup>2</sup> ) | Error (%) |
|----------|----------|-----------------------------------|-----------------|---------------------------------|----|-----------------------|--------|--------|-------------------------------------------|--------------------------------------|-------------------------------|-----------|
| Series A |          |                                   |                 |                                 |    |                       |        |        |                                           |                                      |                               |           |
| A-1      | 25.5     | 35                                | 0               | 9.1                             | 1  | 4.14                  | 6.1057 | 0.3072 | 120                                       | 147                                  | 27                            | 18.1      |
| A-2      | 25.8     | 35                                | 0               | 8.6                             | 1  | 4.14                  | 6.1057 | 0.3072 | 114                                       | 154                                  | 40                            | 26.1      |
| A-3      | 25       | 35                                | 0               | 9.6                             | 1  | 4.14                  | 6.1057 | 0.3072 | 127                                       | 148                                  | 21                            | 14.2      |
| A-4      | 37.5     | 35                                | 0               | 3                               | 1  | 4.14                  | 6.1057 | 0.3072 | 40                                        | 70                                   | 30                            | 43.3      |
| A-5      | 36.9     | 35                                | 0               | 2.98                            | 1  | 4.14                  | 6.1057 | 0.3072 | 39                                        | 73                                   | 34                            | 46.0      |
| A-6      | 40.1     | 35                                | 0               | 4.1                             | 1  | 4.14                  | 6.1057 | 0.3072 | 54                                        | 70                                   | 16                            | 22.5      |
| A-7      | 39.2     | 35                                | 0               | 2.9                             | 1  | 4.14                  | 6.1057 | 0.3072 | 38                                        | 60                                   | 22                            | 36.1      |
| A-8      | 31.1     | 35                                | 0               | 5.9                             | 1  | 4.14                  | 6.1057 | 0.3072 | 78                                        | 81                                   | 3                             | 3.7       |
| A-9      | 32.8     | 35                                | 0               | 7.5                             | 1  | 4.14                  | 6.1057 | 0.3072 | 99                                        | 81                                   | 18                            | 22.5      |
| A-10     | 30.1     | 35                                | 0               | 10.2                            | 1  | 4.14                  | 6.1057 | 0.3072 | 135                                       | 131                                  | 4                             | 3.0       |
| A-11     | 27.3     | 35                                | 0               | 8.9                             | 1  | 4.14                  | 6.1057 | 0.3072 | 118                                       | 128                                  | 10                            | 8.0       |
| A-12     | 31.3     | 35                                | 0               | 9.1                             | 1  | 4.14                  | 6.1057 | 0.3072 | 120                                       | 126                                  | 6                             | 4.5       |
| A-13     | 28.3     | 35                                | 0               | 11.4                            | 1  | 4.14                  | 6.1057 | 0.3072 | 151                                       | 133                                  | 18                            | 13.4      |
| A-14     | 30.6     | 35                                | 0               | 8.1                             | 1  | 4.14                  | 6.1057 | 0.3072 | 107                                       | 123                                  | 16                            | 12.9      |
| A-15     | 29.4     | 35                                | 0               | 8.7                             | 1  | 4.14                  | 6.1057 | 0.3072 | 115                                       | 118                                  | 3                             | 2.5       |
| A-16     | 34.6     | 35                                | 0               | 7.1                             | 1  | 4.14                  | 6.1057 | 0.3072 | 94                                        | 91                                   | 3                             | 3.2       |
| A-17     | 31.1     | 35                                | 0               | 6.4                             | 1  | 4.14                  | 6.1057 | 0.3072 | 85                                        | 89                                   | 4                             | 4.9       |
| A-18     | 30       | 35                                | 0               | 8.7                             | 1  | 4.14                  | 6.1057 | 0.3072 | 115                                       | 146                                  | 31                            | 21.2      |
| A-19     | 24.8     | 35                                | 0               | 9.3                             | 1  | 4.14                  | 6.1057 | 0.3072 | 123                                       | 142                                  | 19                            | 13.4      |
| A-20     | 30.3     | 35                                | 0               | 8.4                             | 1  | 4.14                  | 6.1057 | 0.3072 | 111                                       | 110                                  | 1                             | 1.0       |
| A-21     | 29.7     | 35                                | 0               | 8.6                             | 1  | 4.14                  | 6.1057 | 0.3072 | 114                                       | 110                                  | 4                             | 3.4       |
| A-22     | 28.9     | 35                                | 0               | 10.7                            | 1  | 4.14                  | 6.1057 | 0.3072 | 142                                       | 153                                  | 11                            | 7.5       |
| A-23     | 28       | 35                                | 0               | 9.4                             | 1  | 4.14                  | 6.1057 | 0.3072 | 124                                       | 151                                  | 27                            | 17.7      |
| A-24     | 42.4     | 35                                | 0               | 4.5                             | 1  | 4.14                  | 6.1057 | 0.3072 | 60                                        | 80                                   | 20                            | 25.6      |
| A-25     | 36.9     | 35                                | 0               | 6.5                             | 1  | 4.14                  | 6.1057 | 0.3072 | 86                                        | 77                                   | 9                             | 11.6      |
| A-26     | 23.8     | 35                                | 0               | 6.2                             | 1  | 4.14                  | 6.1057 | 0.3072 | 82                                        | 79                                   | 3                             | 3.8       |
| A-27     | 24.4     | 35                                | 0               | 6.3                             | 1  | 4.14                  | 6.1057 | 0.3072 | 83                                        | 85                                   | 2                             | 2.0       |
| A-28     | 24.3     | 35                                | 0               | 9.7                             | 1  | 4.14                  | 6.1057 | 0.3072 | 128                                       | 125                                  | 3                             | 2.6       |
| A-29     | 24.4     | 35                                | 0               | 9.1                             | 1  | 4.14                  | 6.1057 | 0.3072 | 120                                       | 137                                  | 17                            | 12.2      |

|      |      |    |   |      |   |      |        |        |     |     |    |      |
|------|------|----|---|------|---|------|--------|--------|-----|-----|----|------|
| A-30 | 33.6 | 35 | 0 | 2.9  | 1 | 4.14 | 6.1057 | 0.3072 | 38  | 49  | 11 | 21.7 |
| A-31 | 38   | 35 | 0 | 3.4  | 1 | 4.14 | 6.1057 | 0.3072 | 45  | 45  | 0  | 0.1  |
| A-32 | 31.5 | 35 | 0 | 2.7  | 1 | 4.14 | 6.1057 | 0.3072 | 36  | 32  | 4  | 11.6 |
| A-33 | 35.3 | 35 | 0 | 3.4  | 1 | 4.14 | 6.1057 | 0.3072 | 45  | 48  | 3  | 6.3  |
| A-34 | 30.5 | 35 | 0 | 3.9  | 1 | 4.14 | 6.1057 | 0.3072 | 52  | 58  | 6  | 11.1 |
| A-35 | 29.8 | 35 | 0 | 3.2  | 1 | 4.14 | 6.1057 | 0.3072 | 42  | 68  | 26 | 37.8 |
| A-36 | 43.7 | 35 | 0 | 4.1  | 1 | 4.14 | 6.1057 | 0.3072 | 54  | 87  | 33 | 37.7 |
| A-37 | 44.1 | 35 | 0 | 4.5  | 1 | 4.14 | 6.1057 | 0.3072 | 60  | 88  | 28 | 32.4 |
| A-38 | 36.8 | 35 | 0 | 3.1  | 1 | 4.14 | 6.1057 | 0.3072 | 41  | 61  | 20 | 32.8 |
| A-39 | 36.1 | 35 | 0 | 3.2  | 1 | 4.14 | 6.1057 | 0.3072 | 42  | 74  | 32 | 42.8 |
| A-40 | 28   | 35 | 0 | 8.6  | 1 | 4.14 | 6.1057 | 0.3072 | 114 | 104 | 10 | 9.4  |
| A-41 | 32.1 | 35 | 0 | 6.3  | 1 | 4.14 | 6.1057 | 0.3072 | 83  | 105 | 22 | 20.6 |
| A-42 | 28   | 35 | 0 | 6    | 1 | 4.14 | 6.1057 | 0.3072 | 79  | 90  | 11 | 11.8 |
| A-43 | 31.8 | 35 | 0 | 6    | 1 | 4.14 | 6.1057 | 0.3072 | 79  | 97  | 18 | 18.2 |
| A-44 | 32.7 | 35 | 0 | 6    | 1 | 4.14 | 6.1057 | 0.3072 | 79  | 92  | 13 | 13.7 |
| A-45 | 34.3 | 35 | 0 | 5.6  | 1 | 4.14 | 6.1057 | 0.3072 | 74  | 81  | 7  | 8.6  |
| A-46 | 27.7 | 35 | 0 | 8.8  | 1 | 4.14 | 6.1057 | 0.3072 | 116 | 127 | 11 | 8.4  |
| A-47 | 32.4 | 35 | 0 | 7.1  | 1 | 4.14 | 6.1057 | 0.3072 | 94  | 121 | 27 | 22.4 |
| A-48 | 31.7 | 35 | 0 | 9.5  | 1 | 4.14 | 6.1057 | 0.3072 | 126 | 165 | 39 | 23.9 |
| A-49 | 31.3 | 35 | 0 | 11.6 | 1 | 4.14 | 6.1057 | 0.3072 | 153 | 152 | 1  | 0.9  |
| A-50 | 28.4 | 35 | 0 | 4.49 | 1 | 4.14 | 6.1057 | 0.3072 | 59  | 113 | 54 | 47.4 |
| A-51 | 29.5 | 35 | 0 | 5.9  | 1 | 4.14 | 6.1057 | 0.3072 | 78  | 97  | 19 | 19.6 |
| A-52 | 34   | 35 | 0 | 5    | 1 | 4.14 | 6.1057 | 0.3072 | 66  | 102 | 36 | 35.2 |
| A-53 | 35.6 | 35 | 0 | 5    | 1 | 4.14 | 6.1057 | 0.3072 | 66  | 107 | 41 | 38.2 |
| A-54 | 17.3 | 35 | 0 | 6.2  | 1 | 4.14 | 6.1057 | 0.3072 | 82  | 115 | 33 | 28.7 |
| A-55 | 18.7 | 35 | 0 | 9.1  | 1 | 4.14 | 6.1057 | 0.3072 | 120 | 115 | 5  | 4.7  |
| A-56 | 17.7 | 35 | 0 | 7.8  | 1 | 4.14 | 6.1057 | 0.3072 | 103 | 71  | 32 | 45.3 |
| A-57 | 20   | 35 | 0 | 4.3  | 1 | 4.14 | 6.1057 | 0.3072 | 57  | 72  | 15 | 21.0 |
| A-58 | 17.9 | 35 | 0 | 6.1  | 1 | 4.14 | 6.1057 | 0.3072 | 81  | 78  | 3  | 3.4  |
| A-59 | 13.9 | 35 | 0 | 11.6 | 1 | 4.14 | 6.1057 | 0.3072 | 153 | 202 | 49 | 24.1 |
| A-60 | 13.7 | 35 | 0 | 14.8 | 1 | 4.14 | 6.1057 | 0.3072 | 196 | 213 | 17 | 8.1  |
| A-61 | 17.7 | 35 | 0 | 7.3  | 1 | 4.14 | 6.1057 | 0.3072 | 97  | 124 | 27 | 22.1 |
| A-62 | 11.7 | 35 | 0 | 12.1 | 1 | 4.14 | 6.1057 | 0.3072 | 160 | 128 | 32 | 25.0 |

|      |      |    |   |      |   |      |        |        |     |     |     |      |
|------|------|----|---|------|---|------|--------|--------|-----|-----|-----|------|
| A-63 | 16   | 35 | 0 | 9.8  | 1 | 4.14 | 6.1057 | 0.3072 | 130 | 97  | 33  | 33.6 |
| A-64 | 17.1 | 35 | 0 | 8.6  | 1 | 4.14 | 6.1057 | 0.3072 | 114 | 90  | 24  | 26.4 |
| A-65 | 16.6 | 35 | 0 | 8.8  | 1 | 4.14 | 6.1057 | 0.3072 | 116 | 108 | 8   | 7.8  |
| A-66 | 21.1 | 35 | 0 | 5.3  | 1 | 4.14 | 6.1057 | 0.3072 | 70  | 102 | 32  | 31.3 |
| A-67 | 21.3 | 35 | 0 | 8.3  | 1 | 4.14 | 6.1057 | 0.3072 | 110 | 107 | 3   | 2.6  |
| A-68 | 21   | 35 | 0 | 9.9  | 1 | 4.14 | 6.1057 | 0.3072 | 131 | 117 | 14  | 11.9 |
| A-69 | 10.1 | 35 | 0 | 7.5  | 1 | 4.14 | 6.1057 | 0.3072 | 99  | 145 | 46  | 31.6 |
| A-70 | 16   | 35 | 0 | 7.7  | 1 | 4.14 | 6.1057 | 0.3072 | 102 | 142 | 40  | 28.3 |
| A-71 | 9.7  | 35 | 0 | 10.2 | 1 | 4.14 | 6.1057 | 0.3072 | 135 | 143 | 8   | 5.7  |
| A-72 | 14.6 | 35 | 0 | 9.8  | 1 | 4.14 | 6.1057 | 0.3072 | 130 | 148 | 18  | 12.4 |
| A-73 | 20.6 | 35 | 0 | 9.7  | 1 | 4.14 | 6.1057 | 0.3072 | 128 | 141 | 13  | 9.0  |
| A-74 | 25.4 | 25 | 0 | 7.4  | 1 | 4.14 | 5.2877 | 0.2822 | 82  | 141 | 59  | 42.0 |
| A-75 | 24.1 | 50 | 0 | 9.2  | 1 | 4.14 | 7.3327 | 0.3447 | 154 | 181 | 27  | 14.9 |
| A-76 | 24.7 | 75 | 0 | 9.5  | 1 | 4.14 | 9.3777 | 0.4072 | 222 | 232 | 10  | 4.1  |
| A-77 | 13.9 | 25 | 0 | 13.7 | 1 | 4.14 | 5.2877 | 0.2822 | 151 | 186 | 35  | 18.6 |
| A-78 | 13.7 | 50 | 0 | 15.9 | 1 | 4.14 | 7.3327 | 0.3447 | 266 | 284 | 18  | 6.2  |
| A-79 | 13.7 | 75 | 0 | 16.9 | 1 | 4.14 | 9.3777 | 0.4072 | 396 | 333 | 63  | 18.8 |
| A-80 | 46.3 | 75 | 1 | 8.1  | 1 | 4.14 | 9.3777 | 0.4072 | 135 | 122 | 13  | 11.0 |
| A-81 | 47.7 | 75 | 0 | 9    | 1 | 4.14 | 9.3777 | 0.4072 | 211 | 176 | 35  | 19.7 |
| A-82 | 8    | 75 | 0 | 12.4 | 1 | 4.14 | 9.3777 | 0.4072 | 290 | 190 | 100 | 52.8 |
| A-83 | 18.5 | 75 | 0 | 11.3 | 1 | 4.14 | 9.3777 | 0.4072 | 265 | 167 | 98  | 58.4 |
| A-84 | 31.7 | 75 | 0 | 6.8  | 1 | 4.14 | 9.3777 | 0.4072 | 159 | 139 | 20  | 14.5 |
| A-85 | 10.8 | 75 | 0 | 12.5 | 1 | 4.14 | 9.3777 | 0.4072 | 293 | 245 | 48  | 19.5 |
| A-86 | 22.2 | 75 | 0 | 9.9  | 1 | 4.14 | 9.3777 | 0.4072 | 232 | 226 | 6   | 2.6  |
| A-87 | 33.1 | 75 | 0 | 8.3  | 1 | 4.14 | 9.3777 | 0.4072 | 194 | 168 | 26  | 15.7 |
| A-88 | 22   | 75 | 0 | 9    | 1 | 4.14 | 9.3777 | 0.4072 | 211 | 163 | 48  | 29.3 |
| A-89 | 24.7 | 35 | 1 | 7.4  | 1 | 4.14 | 6.1057 | 0.3072 | 70  | 125 | 55  | 44.1 |
| A-90 | 25.7 | 50 | 1 | 8.4  | 1 | 4.14 | 7.3327 | 0.3447 | 101 | 142 | 41  | 29.2 |
| A-91 | 27   | 75 | 1 | 7.4  | 1 | 4.14 | 9.3777 | 0.4072 | 124 | 178 | 54  | 30.5 |
| A-92 | 14.5 | 25 | 1 | 13.4 | 1 | 4.14 | 5.2877 | 0.2822 | 106 | 111 | 5   | 4.7  |
| A-93 | 14.7 | 35 | 1 | 16.7 | 1 | 4.14 | 6.1057 | 0.3072 | 158 | 165 | 7   | 4.4  |
| A-94 | 13.7 | 50 | 1 | 15.8 | 1 | 4.14 | 7.3327 | 0.3447 | 189 | 211 | 22  | 10.4 |
| A-95 | 13.6 | 75 | 1 | 14.1 | 1 | 4.14 | 9.3777 | 0.4072 | 236 | 238 | 2   | 0.9  |

|       |      |    |   |      |   |      |        |        |     |     |    |      |
|-------|------|----|---|------|---|------|--------|--------|-----|-----|----|------|
| A-96  | 10   | 35 | 1 | 8.9  | 1 | 4.14 | 6.1057 | 0.3072 | 84  | 104 | 20 | 19.2 |
| A-97  | 27.6 | 35 | 1 | 10.8 | 1 | 4.14 | 6.1057 | 0.3072 | 102 | 115 | 13 | 11.3 |
| A-98  | 28   | 35 | 0 | 11.5 | 1 | 4.14 | 6.1057 | 0.3072 | 152 | 149 | 3  | 2.1  |
| A-99  | 27.3 | 75 | 0 | 11   | 1 | 4.14 | 9.3777 | 0.4072 | 258 | 219 | 39 | 17.6 |
| A-100 | 30.9 | 75 | 1 | 10.4 | 1 | 4.14 | 9.3777 | 0.4072 | 174 | 189 | 15 | 8.0  |

#### Series B

|      |      |    |   |      |   |      |        |        |     |     |    |      |
|------|------|----|---|------|---|------|--------|--------|-----|-----|----|------|
| B-1  | 28.6 | 35 | 0 | 11.1 | 1 | 4.14 | 6.1057 | 0.3072 | 147 | 119 | 28 | 23.4 |
| B-2  | 28.2 | 35 | 0 | 11.6 | 1 | 4.14 | 6.1057 | 0.3072 | 153 | 126 | 27 | 21.8 |
| B-3  | 10.9 | 35 | 0 | 11.1 | 1 | 4.14 | 6.1057 | 0.3072 | 147 | 89  | 58 | 64.9 |
| B-4  | 11   | 35 | 0 | 9.8  | 1 | 4.14 | 6.1057 | 0.3072 | 130 | 93  | 37 | 39.4 |
| B-5  | 20.8 | 35 | 0 | 11.6 | 1 | 4.14 | 6.1057 | 0.3072 | 153 | 131 | 22 | 17.1 |
| B-6  | 19   | 35 | 0 | 11.1 | 1 | 4.14 | 6.1057 | 0.3072 | 147 | 139 | 8  | 5.6  |
| B-7  | 14.3 | 35 | 0 | 8.9  | 1 | 4.14 | 6.1057 | 0.3072 | 118 | 105 | 13 | 12.1 |
| B-8  | 21   | 35 | 0 | 6.9  | 1 | 4.14 | 6.1057 | 0.3072 | 91  | 114 | 23 | 20.0 |
| B-9  | 23.3 | 35 | 0 | 11.3 | 1 | 4.14 | 6.1057 | 0.3072 | 149 | 147 | 2  | 1.7  |
| B-10 | 24.3 | 35 | 0 | 10.9 | 1 | 4.14 | 6.1057 | 0.3072 | 144 | 153 | 9  | 5.8  |
| B-11 | 11   | 75 | 0 | 10   | 1 | 4.14 | 9.3777 | 0.4072 | 234 | 146 | 88 | 60.4 |
| B-12 | 30   | 75 | 0 | 10.1 | 1 | 4.14 | 9.3777 | 0.4072 | 236 | 201 | 35 | 17.7 |
| B-13 | 20.7 | 25 | 0 | 9.7  | 1 | 4.14 | 5.2877 | 0.2822 | 107 | 128 | 21 | 16.2 |
| B-14 | 19.8 | 50 | 0 | 10.5 | 1 | 4.14 | 7.3327 | 0.3447 | 176 | 195 | 19 | 9.8  |
| B-15 | 19.6 | 75 | 0 | 10   | 1 | 4.14 | 9.3777 | 0.4072 | 234 | 216 | 18 | 8.4  |

#### Series C

|     |       |    |   |      |     |      |        |        |    |     |    |      |
|-----|-------|----|---|------|-----|------|--------|--------|----|-----|----|------|
| C-1 | 136   | 35 | 0 | 9.36 | 0.4 | 4.14 | 6.1057 | 0.3072 | 93 | 108 | 15 | 13.5 |
| C-2 | 136   | 35 | 1 | 9.36 | 0.4 | 4.14 | 6.1057 | 0.3072 | 48 | 88  | 40 | 45.3 |
| C-3 | 70    | 35 | 0 | 6.75 | 1   | 4.14 | 6.1057 | 0.3072 | 89 | 145 | 56 | 38.4 |
| C-4 | 70    | 35 | 1 | 6.75 | 1   | 4.14 | 6.1057 | 0.3072 | 64 | 90  | 26 | 29.2 |
| C-5 | 175.7 | 35 | 0 | 6.75 | 0.4 | 4.14 | 6.1057 | 0.3072 | 67 | 87  | 20 | 22.6 |
| C-6 | 174.6 | 35 | 1 | 6.75 | 0.4 | 4.14 | 6.1057 | 0.3072 | 48 | 52  | 4  | 7.5  |

#### Series D

|     |      |    |   |      |   |      |        |        |     |     |    |      |
|-----|------|----|---|------|---|------|--------|--------|-----|-----|----|------|
| D-1 | 24.1 | 35 | 0 | 16.1 | 1 | 4.14 | 6.1057 | 0.3072 | 213 | 273 | 60 | 22.0 |
|-----|------|----|---|------|---|------|--------|--------|-----|-----|----|------|

|      |      |    |   |      |       |      |        |        |     |     |    |      |
|------|------|----|---|------|-------|------|--------|--------|-----|-----|----|------|
| D-2  | 24.1 | 35 | 0 | 17.7 | 1     | 4.14 | 6.1057 | 0.3072 | 234 | 283 | 49 | 17.3 |
| D-3  | 10   | 35 | 0 | 15.3 | 1     | 4.14 | 6.1057 | 0.3072 | 202 | 236 | 34 | 14.3 |
| D-4  | 32.2 | 35 | 0 | 14.4 | 0.735 | 4.14 | 6.1057 | 0.3072 | 173 | 200 | 27 | 13.4 |
| D-5  | 32   | 35 | 0 | 14.3 | 0.781 | 4.14 | 6.1057 | 0.3072 | 175 | 219 | 44 | 19.9 |
| D-6  | 34   | 35 | 0 | 16.4 | 0.735 | 4.14 | 6.1057 | 0.3072 | 197 | 170 | 27 | 16.1 |
| D-7  | 33   | 35 | 0 | 9.7  | 0.758 | 4.14 | 6.1057 | 0.3072 | 118 | 144 | 26 | 18.2 |
| D-8  | 34   | 35 | 0 | 14.2 | 0.735 | 4.14 | 6.1057 | 0.3072 | 171 | 153 | 18 | 11.7 |
| D-9  | 18   | 35 | 0 | 12.7 | 0.556 | 4.14 | 6.1057 | 0.3072 | 140 | 195 | 55 | 28.1 |
| D-10 | 18   | 35 | 0 | 14.2 | 0.556 | 4.14 | 6.1057 | 0.3072 | 157 | 133 | 24 | 17.9 |
| D-11 | 16   | 35 | 0 | 17.7 | 0.625 | 4.14 | 6.1057 | 0.3072 | 203 | 255 | 52 | 20.5 |
| D-12 | 18   | 35 | 0 | 11   | 0.556 | 4.14 | 6.1057 | 0.3072 | 121 | 164 | 43 | 25.9 |
| D-13 | 18   | 35 | 0 | 12.7 | 0.625 | 4.14 | 6.1057 | 0.3072 | 145 | 158 | 13 | 8.0  |

#### Series E

|      |      |    |   |         |   |      |        |        |     |     |    |      |
|------|------|----|---|---------|---|------|--------|--------|-----|-----|----|------|
| E-1  | 15.5 | 35 | 0 | 11.1    | 1 | 4.14 | 6.1057 | 0.3072 | 147 | 174 | 27 | 15.6 |
| E-2  | 16   | 35 | 0 | 13.6    | 1 | 4.14 | 6.1057 | 0.3072 | 180 | 133 | 47 | 35.2 |
| E-3  | 14.3 | 35 | 0 | 14.1    | 1 | 4.14 | 6.1057 | 0.3072 | 186 | 196 | 10 | 4.9  |
| E-4  | 22.7 | 35 | 0 | 5.3     | 1 | 4.14 | 6.1057 | 0.3072 | 70  | 81  | 11 | 13.5 |
| E-5  | 25.7 | 35 | 0 | 14.586  | 1 | 4.14 | 6.1057 | 0.3072 | 193 | 135 | 58 | 42.9 |
| E-6  | 23.7 | 35 | 0 | 10.4    | 1 | 4.14 | 6.1057 | 0.3072 | 138 | 138 | 0  | 0.3  |
| E-7  | 22   | 35 | 0 | 12.5    | 1 | 4.14 | 6.1057 | 0.3072 | 165 | 187 | 22 | 11.6 |
| E-8  | 22.1 | 35 | 0 | 13.6136 | 1 | 4.14 | 6.1057 | 0.3072 | 180 | 259 | 79 | 30.5 |
| E-9  | 20.4 | 35 | 0 | 10.4    | 1 | 4.14 | 6.1057 | 0.3072 | 138 | 213 | 75 | 35.4 |
| E-10 | 27.1 | 35 | 0 | 12.2    | 1 | 4.14 | 6.1057 | 0.3072 | 161 | 119 | 42 | 35.6 |
| E-11 | 22.4 | 35 | 0 | 9.2     | 1 | 4.14 | 6.1057 | 0.3072 | 122 | 120 | 2  | 1.4  |
| E-12 | 23.2 | 35 | 0 | 4.7     | 1 | 4.14 | 6.1057 | 0.3072 | 62  | 77  | 15 | 19.3 |
| E-13 | 21.6 | 35 | 0 | 12.7    | 1 | 4.14 | 6.1057 | 0.3072 | 168 | 151 | 17 | 11.2 |
| E-14 | 19.3 | 35 | 0 | 13.3    | 1 | 4.14 | 6.1057 | 0.3072 | 176 | 177 | 1  | 0.6  |
| E-15 | 20.5 | 35 | 0 | 12.9064 | 1 | 4.14 | 6.1057 | 0.3072 | 171 | 172 | 1  | 0.8  |
| E-16 | 23   | 35 | 0 | 5.8     | 1 | 4.14 | 6.1057 | 0.3072 | 77  | 88  | 11 | 12.8 |
| E-17 | 20.3 | 35 | 0 | 6.188   | 1 | 4.14 | 6.1057 | 0.3072 | 82  | 107 | 25 | 23.5 |

#### Series F

|      |      |    |   |      |   |      |        |        |     |     |    |      |
|------|------|----|---|------|---|------|--------|--------|-----|-----|----|------|
| F-1  | 2.6  | 25 | 1 | 14.8 | 1 | 2.6  | 5.2877 | 0.2822 | 102 | 121 | 19 | 15.3 |
| F-2  | 2.6  | 35 | 1 | 14.8 | 1 | 2.6  | 6.1057 | 0.3072 | 121 | 143 | 22 | 15.2 |
| F-3  | 2.6  | 50 | 1 | 14.8 | 1 | 2.6  | 7.3327 | 0.3447 | 151 | 169 | 18 | 10.7 |
| F-4  | 2.6  | 75 | 1 | 14.8 | 1 | 2.6  | 9.3777 | 0.4072 | 205 | 207 | 2  | 1.1  |
| F-5  | 2.2  | 25 | 1 | 13.6 | 1 | 2.2  | 5.2877 | 0.2822 | 90  | 109 | 19 | 17.6 |
| F-6  | 2.2  | 35 | 1 | 13.6 | 1 | 2.2  | 6.1057 | 0.3072 | 106 | 123 | 17 | 14.0 |
| F-7  | 2.2  | 50 | 1 | 13.6 | 1 | 2.2  | 7.3327 | 0.3447 | 131 | 140 | 9  | 6.5  |
| F-8  | 2.2  | 75 | 1 | 13.6 | 1 | 2.2  | 9.3777 | 0.4072 | 176 | 157 | 19 | 12.0 |
| F-9  | 1.5  | 25 | 1 | 14.3 | 1 | 1.5  | 5.2877 | 0.2822 | 85  | 91  | 6  | 6.8  |
| F-10 | 1.5  | 35 | 1 | 14.3 | 1 | 1.5  | 6.1057 | 0.3072 | 99  | 106 | 7  | 6.7  |
| F-11 | 1.5  | 50 | 1 | 14.3 | 1 | 1.5  | 7.3327 | 0.3447 | 121 | 116 | 5  | 4.0  |
| F-12 | 1.5  | 75 | 1 | 14.3 | 1 | 1.5  | 9.3777 | 0.4072 | 158 | 144 | 14 | 9.8  |
| F-13 | 1.8  | 25 | 1 | 12.4 | 1 | 1.8  | 5.2877 | 0.2822 | 77  | 97  | 20 | 20.2 |
| F-14 | 1.8  | 35 | 1 | 12.4 | 1 | 1.8  | 6.1057 | 0.3072 | 91  | 103 | 12 | 11.9 |
| F-15 | 1.8  | 50 | 1 | 12.4 | 1 | 1.8  | 7.3327 | 0.3447 | 111 | 124 | 13 | 10.2 |
| F-16 | 1.8  | 75 | 1 | 12.4 | 1 | 1.8  | 9.3777 | 0.4072 | 148 | 150 | 2  | 1.5  |
| F-17 | 1.1  | 25 | 1 | 12.4 | 1 | 1.1  | 5.2877 | 0.2822 | 67  | 63  | 4  | 6.9  |
| F-18 | 1.1  | 35 | 1 | 12.4 | 1 | 1.1  | 6.1057 | 0.3072 | 78  | 65  | 13 | 19.9 |
| F-19 | 1.1  | 50 | 1 | 12.4 | 1 | 1.1  | 7.3327 | 0.3447 | 94  | 76  | 18 | 23.6 |
| F-20 | 1.1  | 75 | 1 | 12.4 | 1 | 1.1  | 9.3777 | 0.4072 | 121 | 98  | 23 | 23.4 |
| F-21 | 1.5  | 25 | 1 | 12.2 | 1 | 1.5  | 5.2877 | 0.2822 | 72  | 72  | 0  | 0.5  |
| F-22 | 1.5  | 35 | 1 | 12.2 | 1 | 1.5  | 6.1057 | 0.3072 | 84  | 89  | 5  | 5.2  |
| F-23 | 1.5  | 50 | 1 | 12.2 | 1 | 1.5  | 7.3327 | 0.3447 | 103 | 111 | 8  | 7.3  |
| F-24 | 1.5  | 75 | 1 | 12.2 | 1 | 1.5  | 9.3777 | 0.4072 | 135 | 141 | 6  | 4.3  |
| F-25 | 0.85 | 25 | 1 | 12.6 | 1 | 0.85 | 5.2877 | 0.2822 | 64  | 65  | 1  | 2.1  |
| F-26 | 0.85 | 35 | 1 | 12.6 | 1 | 0.85 | 6.1057 | 0.3072 | 73  | 66  | 7  | 10.9 |
| F-27 | 0.85 | 50 | 1 | 12.6 | 1 | 0.85 | 7.3327 | 0.3447 | 87  | 85  | 2  | 2.8  |
| F-28 | 0.85 | 75 | 1 | 12.6 | 1 | 0.85 | 9.3777 | 0.4072 | 111 | 117 | 6  | 5.5  |
| F-29 | 2.1  | 25 | 1 | 12.8 | 1 | 2.1  | 5.2877 | 0.2822 | 83  | 92  | 9  | 9.3  |
| F-30 | 2.1  | 35 | 1 | 12.8 | 1 | 2.1  | 6.1057 | 0.3072 | 98  | 99  | 1  | 0.8  |
| F-31 | 2.1  | 50 | 1 | 12.8 | 1 | 2.1  | 7.3327 | 0.3447 | 121 | 123 | 2  | 1.5  |
| F-32 | 2.1  | 75 | 1 | 12.8 | 1 | 2.1  | 9.3777 | 0.4072 | 162 | 170 | 8  | 4.5  |
| F-33 | 2.46 | 25 | 1 | 10.8 | 1 | 2.46 | 5.2877 | 0.2822 | 74  | 85  | 11 | 13.4 |

|      |      |    |   |      |   |      |        |        |     |     |    |      |
|------|------|----|---|------|---|------|--------|--------|-----|-----|----|------|
| F-34 | 2.46 | 35 | 1 | 10.8 | 1 | 2.46 | 6.1057 | 0.3072 | 87  | 113 | 26 | 23.1 |
| F-35 | 2.46 | 50 | 1 | 10.8 | 1 | 2.46 | 7.3327 | 0.3447 | 108 | 135 | 27 | 20.0 |
| F-36 | 2.46 | 75 | 1 | 10.8 | 1 | 2.46 | 9.3777 | 0.4072 | 146 | 186 | 40 | 21.4 |
| F-37 | 2.45 | 25 | 1 | 8.8  | 1 | 2.45 | 5.2877 | 0.2822 | 60  | 49  | 11 | 22.3 |
| F-38 | 2.45 | 35 | 1 | 8.8  | 1 | 2.45 | 6.1057 | 0.3072 | 71  | 103 | 32 | 31.3 |
| F-39 | 2.45 | 50 | 1 | 8.8  | 1 | 2.45 | 7.3327 | 0.3447 | 88  | 103 | 15 | 14.7 |
| F-40 | 2.45 | 75 | 1 | 8.8  | 1 | 2.45 | 9.3777 | 0.4072 | 119 | 149 | 30 | 20.2 |
| F-41 | 2.9  | 25 | 1 | 12.2 | 1 | 2.9  | 5.2877 | 0.2822 | 87  | 67  | 20 | 30.0 |
| F-42 | 2.9  | 35 | 1 | 12.2 | 1 | 2.9  | 6.1057 | 0.3072 | 103 | 91  | 12 | 13.5 |
| F-43 | 2.9  | 50 | 1 | 12.2 | 1 | 2.9  | 7.3327 | 0.3447 | 129 | 88  | 41 | 46.7 |
| F-44 | 2.9  | 75 | 1 | 12.2 | 1 | 2.9  | 9.3777 | 0.4072 | 176 | 156 | 20 | 13.1 |
| F-45 | 3.8  | 25 | 1 | 11.3 | 1 | 3.8  | 5.2877 | 0.2822 | 87  | 85  | 2  | 2.5  |
| F-46 | 3.8  | 35 | 1 | 11.3 | 1 | 3.8  | 6.1057 | 0.3072 | 104 | 100 | 4  | 4.0  |
| F-47 | 3.8  | 50 | 1 | 11.3 | 1 | 3.8  | 7.3327 | 0.3447 | 131 | 125 | 6  | 5.0  |
| F-48 | 3.8  | 75 | 1 | 11.3 | 1 | 3.8  | 9.3777 | 0.4072 | 182 | 181 | 1  | 0.8  |
| F-49 | 4.5  | 25 | 1 | 11.8 | 1 | 4.14 | 5.2877 | 0.2822 | 93  | 98  | 5  | 4.9  |
| F-50 | 4.5  | 35 | 1 | 11.8 | 1 | 4.14 | 6.1057 | 0.3072 | 111 | 110 | 1  | 1.3  |
| F-51 | 4.5  | 50 | 1 | 11.8 | 1 | 4.14 | 7.3327 | 0.3447 | 141 | 128 | 13 | 10.3 |
| F-52 | 4.5  | 75 | 1 | 11.8 | 1 | 4.14 | 9.3777 | 0.4072 | 197 | 195 | 2  | 1.2  |
| F-53 | 9.5  | 25 | 1 | 11.1 | 1 | 4.14 | 5.2877 | 0.2822 | 88  | 102 | 14 | 14.1 |
| F-54 | 9.5  | 35 | 1 | 11.1 | 1 | 4.14 | 6.1057 | 0.3072 | 105 | 120 | 15 | 12.6 |
| F-55 | 9.5  | 50 | 1 | 11.1 | 1 | 4.14 | 7.3327 | 0.3447 | 133 | 163 | 30 | 18.5 |
| F-56 | 9.5  | 75 | 1 | 11.1 | 1 | 4.14 | 9.3777 | 0.4072 | 186 | 209 | 23 | 11.2 |
| F-57 | 2.24 | 25 | 1 | 11.6 | 1 | 2.24 | 5.2877 | 0.2822 | 77  | 88  | 11 | 12.5 |
| F-58 | 2.24 | 35 | 1 | 11.6 | 1 | 2.24 | 6.1057 | 0.3072 | 91  | 101 | 10 | 10.2 |
| F-59 | 2.24 | 50 | 1 | 11.6 | 1 | 2.24 | 7.3327 | 0.3447 | 112 | 127 | 15 | 11.6 |
| F-60 | 2.24 | 75 | 1 | 11.6 | 1 | 2.24 | 9.3777 | 0.4072 | 151 | 180 | 29 | 16.1 |
| F-61 | 2.16 | 25 | 1 | 8.3  | 1 | 2.16 | 5.2877 | 0.2822 | 55  | 61  | 6  | 10.6 |
| F-62 | 2.16 | 35 | 1 | 8.3  | 1 | 2.16 | 6.1057 | 0.3072 | 64  | 80  | 16 | 19.7 |
| F-63 | 2.16 | 50 | 1 | 8.3  | 1 | 2.16 | 7.3327 | 0.3447 | 79  | 111 | 32 | 28.5 |
| F-64 | 2.16 | 75 | 1 | 8.3  | 1 | 2.16 | 9.3777 | 0.4072 | 107 | 131 | 24 | 18.7 |
| F-65 | 5.7  | 25 | 1 | 12.9 | 1 | 4.14 | 5.2877 | 0.2822 | 102 | 153 | 51 | 33.4 |
| F-66 | 5.7  | 35 | 1 | 12.9 | 1 | 4.14 | 6.1057 | 0.3072 | 122 | 178 | 56 | 31.5 |

|      |      |    |   |      |   |      |        |        |     |     |     |      |
|------|------|----|---|------|---|------|--------|--------|-----|-----|-----|------|
| F-67 | 5.7  | 50 | 1 | 12.9 | 1 | 4.14 | 7.3327 | 0.3447 | 154 | 196 | 42  | 21.2 |
| F-68 | 5.7  | 75 | 1 | 12.9 | 1 | 4.14 | 9.3777 | 0.4072 | 216 | 299 | 83  | 27.8 |
| F-69 | 10.6 | 25 | 1 | 12.4 | 1 | 4.14 | 5.2877 | 0.2822 | 98  | 158 | 60  | 38.0 |
| F-70 | 10.6 | 35 | 1 | 12.4 | 1 | 4.14 | 6.1057 | 0.3072 | 117 | 198 | 81  | 40.8 |
| F-71 | 10.6 | 50 | 1 | 12.4 | 1 | 4.14 | 7.3327 | 0.3447 | 148 | 227 | 79  | 34.6 |
| F-72 | 10.6 | 75 | 1 | 12.4 | 1 | 4.14 | 9.3777 | 0.4072 | 207 | 301 | 94  | 31.1 |
| F-73 | 10.1 | 25 | 1 | 12.9 | 1 | 4.14 | 5.2877 | 0.2822 | 102 | 164 | 62  | 37.9 |
| F-74 | 10.1 | 35 | 1 | 12.9 | 1 | 4.14 | 6.1057 | 0.3072 | 122 | 186 | 64  | 34.5 |
| F-75 | 10.1 | 50 | 1 | 12.9 | 1 | 4.14 | 7.3327 | 0.3447 | 154 | 210 | 56  | 26.5 |
| F-76 | 10.1 | 75 | 1 | 12.9 | 1 | 4.14 | 9.3777 | 0.4072 | 216 | 291 | 75  | 25.9 |
| F-77 | 17.9 | 25 | 1 | 13.7 | 1 | 4.14 | 5.2877 | 0.2822 | 108 | 136 | 28  | 20.5 |
| F-78 | 17.9 | 35 | 1 | 13.7 | 1 | 4.14 | 6.1057 | 0.3072 | 129 | 176 | 47  | 26.5 |
| F-79 | 17.9 | 50 | 1 | 13.7 | 1 | 4.14 | 7.3327 | 0.3447 | 164 | 237 | 73  | 30.8 |
| F-80 | 17.9 | 75 | 1 | 13.7 | 1 | 4.14 | 9.3777 | 0.4072 | 229 | 332 | 103 | 31.0 |
| F-81 | 3.95 | 25 | 1 | 10.8 | 1 | 3.95 | 5.2877 | 0.2822 | 84  | 126 | 42  | 33.2 |
| F-82 | 3.95 | 35 | 1 | 10.8 | 1 | 3.95 | 6.1057 | 0.3072 | 101 | 141 | 40  | 28.7 |
| F-83 | 3.95 | 50 | 1 | 10.8 | 1 | 3.95 | 7.3327 | 0.3447 | 127 | 189 | 62  | 32.7 |
| F-84 | 3.95 | 75 | 1 | 10.8 | 1 | 3.95 | 9.3777 | 0.4072 | 177 | 245 | 68  | 27.7 |
| F-85 | 3.5  | 35 | 1 | 9.5  | 1 | 3.5  | 6.1057 | 0.3072 | 85  | 88  | 3   | 3.1  |
| F-86 | 3.1  | 35 | 1 | 13.1 | 1 | 3.1  | 6.1057 | 0.3072 | 113 | 71  | 42  | 59.5 |
| F-87 | 3.9  | 25 | 1 | 40   | 1 | 3.9  | 5.2877 | 0.2822 | 311 | 215 | 96  | 44.4 |
| F-88 | 3.9  | 35 | 1 | 40   | 1 | 3.9  | 6.1057 | 0.3072 | 371 | 281 | 90  | 32.0 |
| F-89 | 3.9  | 50 | 1 | 40   | 1 | 3.9  | 7.3327 | 0.3447 | 469 | 369 | 100 | 27.1 |
| F-90 | 3.9  | 75 | 1 | 40   | 1 | 3.9  | 9.3777 | 0.4072 | 653 | 576 | 77  | 13.3 |
| F-91 | 6.1  | 25 | 1 | 40   | 1 | 4.14 | 5.2877 | 0.2822 | 316 | 320 | 4   | 1.3  |
| F-92 | 6.1  | 35 | 1 | 40   | 1 | 4.14 | 6.1057 | 0.3072 | 378 | 348 | 30  | 8.6  |
| F-93 | 6.1  | 50 | 1 | 40   | 1 | 4.14 | 7.3327 | 0.3447 | 479 | 480 | 1   | 0.3  |
| F-94 | 6.1  | 75 | 1 | 40   | 1 | 4.14 | 9.3777 | 0.4072 | 669 | 710 | 41  | 5.8  |
| F-95 | 6.2  | 25 | 1 | 40   | 1 | 4.14 | 5.2877 | 0.2822 | 316 | 276 | 40  | 14.4 |
| F-96 | 6.2  | 35 | 1 | 40   | 1 | 4.14 | 6.1057 | 0.3072 | 378 | 316 | 62  | 19.6 |
| F-97 | 6.2  | 50 | 1 | 40   | 1 | 4.14 | 7.3327 | 0.3447 | 479 | 422 | 57  | 13.4 |
| F-98 | 6.2  | 75 | 1 | 40   | 1 | 4.14 | 9.3777 | 0.4072 | 669 | 743 | 74  | 10.0 |
| F-99 | 10.6 | 25 | 1 | 40   | 1 | 4.14 | 5.2877 | 0.2822 | 316 | 286 | 30  | 10.4 |

|       |      |    |   |      |   |      |        |        |     |     |     |      |
|-------|------|----|---|------|---|------|--------|--------|-----|-----|-----|------|
| F-100 | 10.6 | 35 | 1 | 40   | 1 | 4.14 | 6.1057 | 0.3072 | 378 | 364 | 14  | 3.8  |
| F-101 | 10.6 | 50 | 1 | 40   | 1 | 4.14 | 7.3327 | 0.3447 | 479 | 509 | 30  | 6.0  |
| F-102 | 10.6 | 75 | 1 | 40   | 1 | 4.14 | 9.3777 | 0.4072 | 669 | 870 | 201 | 23.1 |
| F-103 | 2    | 25 | 1 | 13.9 | 1 | 2    | 5.2877 | 0.2822 | 89  | 78  | 11  | 14.6 |
| F-104 | 2    | 35 | 1 | 13.9 | 1 | 2    | 6.1057 | 0.3072 | 105 | 114 | 9   | 7.9  |
| F-105 | 6.3  | 25 | 1 | 13.8 | 1 | 4.14 | 5.2877 | 0.2822 | 109 | 99  | 10  | 10.1 |
| F-106 | 6.3  | 35 | 1 | 13.8 | 1 | 4.14 | 6.1057 | 0.3072 | 130 | 131 | 1   | 0.5  |
| F-107 | 6.3  | 50 | 1 | 13.8 | 1 | 4.14 | 7.3327 | 0.3447 | 165 | 148 | 17  | 11.6 |
| F-108 | 6.3  | 75 | 1 | 13.8 | 1 | 4.14 | 9.3777 | 0.4072 | 231 | 185 | 46  | 24.8 |

#### Series G

|      |     |    |   |      |     |     |        |        |     |     |    |      |
|------|-----|----|---|------|-----|-----|--------|--------|-----|-----|----|------|
| G-1  | 3.7 | 35 | 1 | 17.9 | 1   | 3.7 | 6.1057 | 0.3072 | 163 | 192 | 29 | 14.9 |
| G-2  | 2.7 | 35 | 1 | 19.7 | 1   | 2.7 | 6.1057 | 0.3072 | 163 | 150 | 13 | 8.8  |
| G-3  | 3.5 | 35 | 1 | 22.8 | 1   | 3.5 | 6.1057 | 0.3072 | 205 | 236 | 31 | 13.3 |
| G-4  | 1.4 | 35 | 1 | 15.2 | 1   | 1.4 | 6.1057 | 0.3072 | 103 | 107 | 4  | 3.8  |
| G-5  | 2.3 | 35 | 1 | 14.9 | 1   | 2.3 | 6.1057 | 0.3072 | 118 | 131 | 13 | 10.3 |
| G-6  | 2.2 | 35 | 1 | 18.8 | 0.9 | 2.2 | 6.1057 | 0.3072 | 142 | 176 | 34 | 19.6 |
| G-7  | 3.8 | 50 | 1 | 17.5 | 1   | 3.8 | 7.3327 | 0.3447 | 203 | 255 | 52 | 20.3 |
| G-8  | 2.7 | 50 | 1 | 18.3 | 1   | 2.7 | 7.3327 | 0.3447 | 189 | 222 | 33 | 14.9 |
| G-9  | 3.5 | 50 | 1 | 23   | 1   | 3.5 | 7.3327 | 0.3447 | 260 | 321 | 61 | 19.1 |
| G-10 | 1.5 | 50 | 1 | 15.9 | 1   | 1.5 | 7.3327 | 0.3447 | 134 | 143 | 9  | 6.2  |
| G-11 | 2.3 | 50 | 1 | 14.9 | 1   | 2.3 | 7.3327 | 0.3447 | 146 | 174 | 28 | 16.3 |
| G-12 | 2.2 | 50 | 1 | 20   | 0.9 | 2.2 | 7.3327 | 0.3447 | 186 | 249 | 63 | 25.5 |

#### Series H

|     |      |    |   |       |   |      |        |        |     |     |    |      |
|-----|------|----|---|-------|---|------|--------|--------|-----|-----|----|------|
| H-1 | 7.2  | 35 | 1 | 14.22 | 1 | 4.14 | 6.1057 | 0.3072 | 134 | 132 | 2  | 1.8  |
| H-2 | 8.4  | 35 | 1 | 14.13 | 1 | 4.14 | 6.1057 | 0.3072 | 133 | 141 | 8  | 5.3  |
| H-3 | 8.1  | 35 | 1 | 13.86 | 1 | 4.14 | 6.1057 | 0.3072 | 131 | 128 | 3  | 2.3  |
| H-4 | 5.4  | 35 | 1 | 14.22 | 1 | 4.14 | 6.1057 | 0.3072 | 134 | 107 | 27 | 25.5 |
| H-5 | 10.5 | 35 | 1 | 13.86 | 1 | 4.14 | 6.1057 | 0.3072 | 131 | 136 | 5  | 3.7  |

#### Series I

|      |       |    |   |      |   |      |        |        |     |     |     |       |
|------|-------|----|---|------|---|------|--------|--------|-----|-----|-----|-------|
| I-1  | 24.8  | 75 | 0 | 3.3  | 1 | 4.14 | 9.3777 | 0.4072 | 77  | 43  | 34  | 79.7  |
| I-2  | 8.4   | 35 | 0 | 6.8  | 1 | 4.14 | 6.1057 | 0.3072 | 90  | 80  | 10  | 12.4  |
| I-3  | 8.6   | 50 | 0 | 6.8  | 1 | 4.14 | 7.3327 | 0.3447 | 114 | 80  | 34  | 42.4  |
| I-4  | 8.9   | 75 | 0 | 6.4  | 1 | 4.14 | 9.3777 | 0.4072 | 150 | 170 | 20  | 11.9  |
| I-5  | 10.9  | 35 | 0 | 0.3  | 1 | 4.14 | 6.1057 | 0.3072 | 4   | 8   | 4   | 50.4  |
| I-6  | 11.6  | 50 | 0 | 1.5  | 1 | 4.14 | 7.3327 | 0.3447 | 25  | 17  | 8   | 47.8  |
| I-7  | 10.85 | 75 | 0 | 3.1  | 1 | 4.14 | 9.3777 | 0.4072 | 73  | 26  | 47  | 179.2 |
| I-8  | 2.8   | 25 | 0 | 27.3 | 1 | 2.8  | 5.2877 | 0.2822 | 270 | 279 | 9   | 3.1   |
| I-9  | 2.8   | 35 | 0 | 28.6 | 1 | 2.8  | 6.1057 | 0.3072 | 335 | 297 | 38  | 12.9  |
| I-10 | 2.8   | 50 | 0 | 28.2 | 1 | 2.8  | 7.3327 | 0.3447 | 413 | 355 | 58  | 16.3  |
| I-11 | 4.8   | 50 | 0 | 25.6 | 1 | 4.14 | 7.3327 | 0.3447 | 429 | 276 | 153 | 55.4  |
| I-12 | 4.8   | 50 | 0 | 27.8 | 1 | 4.14 | 7.3327 | 0.3447 | 466 | 357 | 109 | 30.5  |
| I-13 | 4.8   | 50 | 0 | 28.6 | 1 | 4.14 | 7.3327 | 0.3447 | 479 | 381 | 98  | 25.8  |
| I-14 | 14.4  | 50 | 0 | 4.2  | 1 | 4.14 | 7.3327 | 0.3447 | 70  | 73  | 3   | 3.6   |
| I-15 | 17.9  | 50 | 0 | 5.7  | 1 | 4.14 | 7.3327 | 0.3447 | 95  | 88  | 7   | 8.5   |

#### Series J

|     |     |    |   |            |   |      |        |        |     |     |     |      |
|-----|-----|----|---|------------|---|------|--------|--------|-----|-----|-----|------|
| J-1 | 8.8 | 20 | 0 | 20.1178121 | 1 | 4.14 | 4.8787 | 0.2697 | 202 | 221 | 19  | 8.8  |
| J-2 | 8.9 | 30 | 0 | 20.6746988 | 1 | 4.14 | 5.6967 | 0.2947 | 251 | 365 | 114 | 31.3 |
| J-3 | 9   | 40 | 0 | 20.4285714 | 1 | 4.14 | 6.5147 | 0.3197 | 293 | 396 | 103 | 25.9 |
| J-4 | 9.1 | 50 | 0 | 19.5775281 | 1 | 4.14 | 7.3327 | 0.3447 | 328 | 473 | 145 | 30.7 |
| J-5 | 8.9 | 60 | 0 | 20.1882353 | 1 | 4.14 | 8.1507 | 0.3697 | 390 | 524 | 134 | 25.7 |
| J-6 | 8.8 | 70 | 0 | 20.4321839 | 1 | 4.14 | 8.9687 | 0.3947 | 449 | 512 | 63  | 12.2 |

#### Series K

|     |      |    |   |            |   |      |        |        |     |     |    |      |
|-----|------|----|---|------------|---|------|--------|--------|-----|-----|----|------|
| K-1 | 9.9  | 75 | 0 | 15.5259259 | 1 | 4.14 | 9.3777 | 0.4072 | 364 | 275 | 89 | 32.2 |
| K-2 | 11.6 | 50 | 0 | 13.2505747 | 1 | 4.14 | 7.3327 | 0.3447 | 222 | 222 | 0  | 0.0  |
| K-3 | 12   | 50 | 0 | 12.8088889 | 1 | 4.14 | 7.3327 | 0.3447 | 215 | 227 | 12 | 5.5  |
| K-4 | 11.5 | 50 | 0 | 13.3657971 | 1 | 4.14 | 7.3327 | 0.3447 | 224 | 218 | 6  | 2.7  |
| K-5 | 9.5  | 35 | 0 | 16.1796491 | 1 | 4.14 | 6.1057 | 0.3072 | 214 | 195 | 19 | 9.7  |
| K-6 | 10.2 | 35 | 0 | 15.069281  | 1 | 4.14 | 6.1057 | 0.3072 | 199 | 195 | 4  | 2.2  |
| K-7 | 10.5 | 35 | 0 | 14.6387302 | 1 | 4.14 | 6.1057 | 0.3072 | 194 | 190 | 4  | 1.9  |
| K-8 | 11.7 | 25 | 0 | 13.1373219 | 1 | 4.14 | 5.2877 | 0.2822 | 145 | 166 | 21 | 12.5 |

|      |      |    |   |            |   |      |        |        |     |     |    |      |
|------|------|----|---|------------|---|------|--------|--------|-----|-----|----|------|
| K-9  | 11   | 25 | 0 | 13.9733333 | 1 | 4.14 | 5.2877 | 0.2822 | 154 | 176 | 22 | 12.2 |
| K-10 | 11.2 | 25 | 0 | 13.7238095 | 1 | 4.14 | 5.2877 | 0.2822 | 152 | 175 | 23 | 13.3 |
| K-11 | 11.4 | 17 | 0 | 13.4830409 | 1 | 4.14 | 4.6333 | 0.2622 | 127 | 184 | 57 | 31.0 |
| K-12 | 11   | 17 | 0 | 13.9733333 | 1 | 4.14 | 4.6333 | 0.2622 | 132 | 173 | 41 | 24.0 |

#### Series L

|     |      |    |   |       |   |      |        |        |     |     |     |      |
|-----|------|----|---|-------|---|------|--------|--------|-----|-----|-----|------|
| L-1 | 3.4  | 35 | 0 | 32.04 | 1 | 3.4  | 6.1057 | 0.3072 | 399 | 355 | 44  | 12.4 |
| L-2 | 6.8  | 35 | 0 | 32.04 | 1 | 4.14 | 6.1057 | 0.3072 | 424 | 403 | 21  | 5.1  |
| L-3 | 5.1  | 25 | 0 | 32.04 | 1 | 4.14 | 5.2877 | 0.2822 | 354 | 335 | 19  | 5.7  |
| L-4 | 10.2 | 25 | 0 | 32.04 | 1 | 4.14 | 5.2877 | 0.2822 | 354 | 340 | 14  | 4.2  |
| L-5 | 5.1  | 35 | 0 | 32.04 | 1 | 4.14 | 6.1057 | 0.3072 | 424 | 355 | 69  | 19.4 |
| L-6 | 10.2 | 35 | 0 | 32.04 | 1 | 4.14 | 6.1057 | 0.3072 | 424 | 380 | 44  | 11.5 |
| L-7 | 5.1  | 45 | 0 | 32.04 | 1 | 4.14 | 6.9237 | 0.3322 | 498 | 370 | 128 | 34.6 |
| L-8 | 10.2 | 45 | 0 | 32.04 | 1 | 4.14 | 6.9237 | 0.3322 | 498 | 405 | 93  | 22.9 |

#### Series M

|      |        |    |   |      |       |      |        |        |     |       |    |      |
|------|--------|----|---|------|-------|------|--------|--------|-----|-------|----|------|
| M-1  | 273    | 50 | 0 | 5.04 | 0.357 | 4.14 | 7.3327 | 0.3447 | 59  | 82    | 23 | 27.8 |
| M-2  | 262    | 50 | 0 | 5.04 | 0.357 | 4.14 | 7.3327 | 0.3447 | 59  | 85    | 26 | 30.3 |
| M-3  | 347.3  | 50 | 0 | 5.04 | 0.286 | 4.14 | 7.3327 | 0.3447 | 55  | 76.74 | 22 | 28.6 |
| M-4  | 344.2  | 50 | 0 | 5.04 | 0.286 | 4.14 | 7.3327 | 0.3447 | 55  | 77.02 | 22 | 28.8 |
| M-5  | 377    | 50 | 0 | 5.04 | 0.238 | 4.14 | 7.3327 | 0.3447 | 51  | 72.3  | 21 | 28.8 |
| M-6  | 495.21 | 50 | 0 | 5.04 | 0.185 | 4.14 | 7.3327 | 0.3447 | 47  | 67.92 | 21 | 30.5 |
| M-7  | 506    | 50 | 0 | 6.3  | 0.357 | 4.14 | 7.3327 | 0.3447 | 74  | 73.2  | 1  | 1.1  |
| M-8  | 523    | 50 | 0 | 6.3  | 0.357 | 4.14 | 7.3327 | 0.3447 | 74  | 47.6  | 26 | 55.5 |
| M-9  | 405.2  | 50 | 0 | 5.67 | 0.357 | 4.14 | 7.3327 | 0.3447 | 67  | 83.15 | 17 | 19.9 |
| M-10 | 408.9  | 50 | 0 | 5.67 | 0.357 | 4.14 | 7.3327 | 0.3447 | 67  | 78.67 | 12 | 15.3 |
| M-11 | 423    | 50 | 0 | 9.45 | 0.357 | 4.14 | 7.3327 | 0.3447 | 111 | 88.7  | 22 | 25.2 |
| M-12 | 435    | 50 | 0 | 9.45 | 0.357 | 4.14 | 7.3327 | 0.3447 | 111 | 93.07 | 18 | 19.3 |
| M-13 | 429    | 50 | 0 | 9.45 | 0.357 | 4.14 | 7.3327 | 0.3447 | 111 | 66.5  | 45 | 66.9 |
| M-14 | 386    | 50 | 0 | 9.45 | 0.357 | 4.14 | 7.3327 | 0.3447 | 111 | 86    | 25 | 29.1 |
| M-15 | 355.7  | 50 | 0 | 9.45 | 0.357 | 4.14 | 7.3327 | 0.3447 | 111 | 99.32 | 12 | 11.8 |
| M-16 | 522    | 50 | 0 | 9.45 | 0.286 | 4.14 | 7.3327 | 0.3447 | 103 | 56.03 | 47 | 83.5 |
| M-17 | 519.9  | 50 | 0 | 9.45 | 0.286 | 4.14 | 7.3327 | 0.3447 | 103 | 57.85 | 45 | 77.7 |

|      |       |    |   |      |       |      |        |        |     |       |    |      |
|------|-------|----|---|------|-------|------|--------|--------|-----|-------|----|------|
| M-18 | 214.3 | 50 | 0 | 5.04 | 0.357 | 4.14 | 7.3327 | 0.3447 | 59  | 67.92 | 9  | 12.8 |
| M-19 | 207.7 | 50 | 0 | 5.04 | 0.357 | 4.14 | 7.3327 | 0.3447 | 59  | 59.3  | 0  | 0.2  |
| M-20 | 223   | 50 | 0 | 9.36 | 0.357 | 4.14 | 7.3327 | 0.3447 | 110 | 86    | 24 | 27.9 |
| M-21 | 384   | 50 | 0 | 9.36 | 0.2   | 4.14 | 7.3327 | 0.3447 | 90  | 69    | 21 | 30.5 |
| M-22 | 222   | 50 | 0 | 9.36 | 0.357 | 4.14 | 7.3327 | 0.3447 | 110 | 99    | 11 | 11.1 |
| M-23 | 211   | 50 | 0 | 9.36 | 0.357 | 4.14 | 7.3327 | 0.3447 | 110 | 78    | 32 | 41.0 |
| M-24 | 141   | 50 | 0 | 9.36 | 0.357 | 4.14 | 7.3327 | 0.3447 | 110 | 123   | 13 | 10.6 |
| M-25 | 277   | 50 | 0 | 9.36 | 0.357 | 4.14 | 7.3327 | 0.3447 | 110 | 72    | 38 | 52.7 |
| M-26 | 253   | 50 | 0 | 4.68 | 0.357 | 4.14 | 7.3327 | 0.3447 | 55  | 64    | 9  | 14.1 |
| M-27 | 430   | 50 | 0 | 6.48 | 0.357 | 4.14 | 7.3327 | 0.3447 | 76  | 59    | 17 | 29.0 |
| M-28 | 145   | 50 | 0 | 4.68 | 0.357 | 4.14 | 7.3327 | 0.3447 | 55  | 66    | 11 | 16.7 |
| M-29 | 223   | 30 | 0 | 9.36 | 0.357 | 4.14 | 5.6967 | 0.2947 | 84  | 60    | 24 | 39.6 |
| M-30 | 223   | 40 | 0 | 9.36 | 0.357 | 4.14 | 6.5147 | 0.3197 | 97  | 85    | 12 | 13.8 |
| M-31 | 223   | 60 | 0 | 9.36 | 0.357 | 4.14 | 8.1507 | 0.3697 | 123 | 90    | 33 | 37.1 |
| M-32 | 223   | 70 | 0 | 9.36 | 0.357 | 4.14 | 8.9687 | 0.3947 | 137 | 110   | 27 | 24.7 |

Series N

|      |     |    |   |      |   |      |        |        |     |     |    |      |
|------|-----|----|---|------|---|------|--------|--------|-----|-----|----|------|
| N-1  | 1.2 | 25 | 0 | 15.6 | 1 | 1.2  | 5.2877 | 0.2822 | 122 | 110 | 12 | 10.5 |
| N-2  | 1.2 | 35 | 0 | 15.6 | 1 | 1.2  | 6.1057 | 0.3072 | 141 | 124 | 17 | 13.7 |
| N-3  | 1.2 | 50 | 0 | 15.6 | 1 | 1.2  | 7.3327 | 0.3447 | 171 | 136 | 35 | 25.4 |
| N-4  | 1.2 | 75 | 0 | 15.6 | 1 | 1.2  | 9.3777 | 0.4072 | 221 | 200 | 21 | 10.3 |
| N-5  | 140 | 35 | 0 | 12.2 | 1 | 4.14 | 6.1057 | 0.3072 | 161 | 185 | 24 | 12.8 |
| N-6  | 140 | 50 | 0 | 12.2 | 1 | 4.14 | 7.3327 | 0.3447 | 204 | 198 | 6  | 3.2  |
| N-7  | 140 | 75 | 0 | 12.2 | 1 | 4.14 | 9.3777 | 0.4072 | 286 | 235 | 51 | 21.6 |
| N-8  | 220 | 35 | 0 | 10.2 | 1 | 4.14 | 6.1057 | 0.3072 | 135 | 165 | 30 | 18.2 |
| N-9  | 220 | 50 | 0 | 10.2 | 1 | 4.14 | 7.3327 | 0.3447 | 171 | 176 | 5  | 2.9  |
| N-10 | 220 | 75 | 0 | 10.2 | 1 | 4.14 | 9.3777 | 0.4072 | 239 | 283 | 44 | 15.6 |
| N-11 | 82  | 35 | 0 | 13.5 | 1 | 4.14 | 6.1057 | 0.3072 | 179 | 159 | 20 | 12.3 |
| N-12 | 85  | 35 | 0 | 11.5 | 1 | 4.14 | 6.1057 | 0.3072 | 152 | 163 | 11 | 6.7  |
| N-13 | 98  | 35 | 0 | 13.3 | 1 | 4.14 | 6.1057 | 0.3072 | 176 | 164 | 12 | 7.3  |
| N-14 | 200 | 35 | 0 | 13.5 | 1 | 4.14 | 6.1057 | 0.3072 | 179 | 160 | 19 | 11.6 |
| N-15 | 200 | 50 | 0 | 13.5 | 1 | 4.14 | 7.3327 | 0.3447 | 226 | 241 | 15 | 6.2  |
| N-16 | 200 | 75 | 0 | 13.5 | 1 | 4.14 | 9.3777 | 0.4072 | 316 | 320 | 4  | 1.2  |

|      |     |    |   |      |   |      |        |        |     |     |    |      |
|------|-----|----|---|------|---|------|--------|--------|-----|-----|----|------|
| N-17 | 215 | 35 | 0 | 13.8 | 1 | 4.14 | 6.1057 | 0.3072 | 183 | 161 | 22 | 13.4 |
| N-18 | 215 | 50 | 0 | 13.8 | 1 | 4.14 | 7.3327 | 0.3447 | 231 | 197 | 34 | 17.4 |
| N-19 | 215 | 75 | 0 | 13.8 | 1 | 4.14 | 9.3777 | 0.4072 | 323 | 251 | 72 | 28.7 |
| N-20 | 175 | 35 | 0 | 9.6  | 1 | 4.14 | 6.1057 | 0.3072 | 127 | 136 | 9  | 6.6  |
| N-21 | 175 | 50 | 0 | 9.6  | 1 | 4.14 | 7.3327 | 0.3447 | 161 | 153 | 8  | 5.1  |
| N-22 | 165 | 50 | 0 | 11.6 | 1 | 4.14 | 7.3327 | 0.3447 | 194 | 198 | 4  | 1.9  |
| N-23 | 165 | 75 | 0 | 11.6 | 1 | 4.14 | 9.3777 | 0.4072 | 272 | 244 | 28 | 11.3 |
| N-24 | 230 | 35 | 0 | 12.4 | 1 | 4.14 | 6.1057 | 0.3072 | 164 | 212 | 48 | 22.6 |
| N-25 | 230 | 50 | 0 | 12.4 | 1 | 4.14 | 7.3327 | 0.3447 | 208 | 177 | 31 | 17.4 |
| N-26 | 143 | 50 | 0 | 12.6 | 1 | 4.14 | 7.3327 | 0.3447 | 211 | 181 | 30 | 16.6 |
| N-27 | 250 | 50 | 0 | 12.4 | 1 | 4.14 | 7.3327 | 0.3447 | 208 | 208 | 0  | 0.1  |
| N-28 | 100 | 35 | 0 | 13.6 | 1 | 4.14 | 6.1057 | 0.3072 | 180 | 185 | 5  | 2.8  |
| N-29 | 100 | 50 | 0 | 13.6 | 1 | 4.14 | 7.3327 | 0.3447 | 228 | 207 | 21 | 10.1 |
| N-30 | 100 | 75 | 0 | 13.6 | 1 | 4.14 | 9.3777 | 0.4072 | 318 | 266 | 52 | 19.7 |

Series O

|      |      |    |   |       |   |      |        |        |     |     |     |      |
|------|------|----|---|-------|---|------|--------|--------|-----|-----|-----|------|
| O-1  | 1    | 25 | 0 | 11.16 | 1 | 1    | 5.2877 | 0.2822 | 83  | 111 | 28  | 25.6 |
| O-2  | 1    | 35 | 0 | 11.16 | 1 | 1    | 6.1057 | 0.3072 | 95  | 124 | 29  | 23.1 |
| O-3  | 1    | 50 | 0 | 11.16 | 1 | 1    | 7.3327 | 0.3447 | 115 | 136 | 21  | 15.8 |
| O-4  | 1    | 75 | 0 | 11.16 | 1 | 1    | 9.3777 | 0.4072 | 147 | 200 | 53  | 26.7 |
| O-5  | 12.5 | 25 | 0 | 11.16 | 1 | 4.14 | 5.2877 | 0.2822 | 123 | 126 | 3   | 2.1  |
| O-6  | 12.5 | 35 | 0 | 11.16 | 1 | 4.14 | 6.1057 | 0.3072 | 148 | 145 | 3   | 1.8  |
| O-7  | 12.5 | 50 | 0 | 11.16 | 1 | 4.14 | 7.3327 | 0.3447 | 187 | 186 | 1   | 0.5  |
| O-8  | 12.5 | 75 | 0 | 11.16 | 1 | 4.14 | 9.3777 | 0.4072 | 261 | 220 | 41  | 18.8 |
| O-9  | 6    | 25 | 0 | 12.06 | 1 | 4.14 | 5.2877 | 0.2822 | 133 | 230 | 97  | 42.0 |
| O-10 | 6    | 35 | 0 | 12.06 | 1 | 4.14 | 6.1057 | 0.3072 | 159 | 266 | 107 | 40.0 |
| O-11 | 6    | 50 | 0 | 12.06 | 1 | 4.14 | 7.3327 | 0.3447 | 202 | 272 | 70  | 25.7 |
| O-12 | 6    | 75 | 0 | 12.06 | 1 | 4.14 | 9.3777 | 0.4072 | 282 | 372 | 90  | 24.1 |
| O-13 | 8    | 25 | 0 | 12.06 | 1 | 4.14 | 5.2877 | 0.2822 | 133 | 145 | 12  | 8.1  |
| O-14 | 8    | 35 | 0 | 12.06 | 1 | 4.14 | 6.1057 | 0.3072 | 159 | 153 | 6   | 4.2  |
| O-15 | 8    | 50 | 0 | 12.06 | 1 | 4.14 | 7.3327 | 0.3447 | 202 | 178 | 24  | 13.5 |
| O-16 | 8    | 75 | 0 | 12.06 | 1 | 4.14 | 9.3777 | 0.4072 | 282 | 229 | 53  | 23.3 |
| O-17 | 29   | 50 | 0 | 12.06 | 1 | 4.14 | 7.3327 | 0.3447 | 202 | 191 | 11  | 5.8  |

|      |     |    |   |       |   |      |        |        |     |     |    |      |
|------|-----|----|---|-------|---|------|--------|--------|-----|-----|----|------|
| O-18 | 100 | 35 | 0 | 12.24 | 1 | 4.14 | 6.1057 | 0.3072 | 162 | 157 | 5  | 3.1  |
| O-19 | 53  | 50 | 0 | 12.24 | 1 | 4.14 | 7.3327 | 0.3447 | 205 | 180 | 25 | 13.9 |
| O-20 | 110 | 35 | 0 | 11.52 | 1 | 4.14 | 6.1057 | 0.3072 | 152 | 172 | 20 | 11.4 |
| O-21 | 56  | 50 | 0 | 11.52 | 1 | 4.14 | 7.3327 | 0.3447 | 193 | 207 | 14 | 6.8  |
| O-22 | 150 | 35 | 0 | 11.43 | 1 | 4.14 | 6.1057 | 0.3072 | 151 | 161 | 10 | 6.1  |
| O-23 | 67  | 50 | 0 | 11.43 | 1 | 4.14 | 7.3327 | 0.3447 | 191 | 198 | 7  | 3.3  |
| O-24 | 110 | 35 | 0 | 12.42 | 1 | 4.14 | 6.1057 | 0.3072 | 164 | 174 | 10 | 5.6  |
| O-25 | 50  | 35 | 0 | 12.42 | 1 | 4.14 | 6.1057 | 0.3072 | 164 | 193 | 29 | 14.9 |
| O-26 | 50  | 50 | 0 | 12.42 | 1 | 4.14 | 7.3327 | 0.3447 | 208 | 166 | 42 | 25.3 |
| O-27 | 50  | 75 | 0 | 12.42 | 1 | 4.14 | 9.3777 | 0.4072 | 291 | 243 | 48 | 19.7 |
| O-28 | 102 | 50 | 0 | 12.42 | 1 | 4.14 | 7.3327 | 0.3447 | 208 | 178 | 30 | 16.9 |
| O-29 | 33  | 50 | 0 | 12.42 | 1 | 4.14 | 7.3327 | 0.3447 | 208 | 187 | 21 | 11.3 |
| O-30 | 110 | 35 | 0 | 12.06 | 1 | 4.14 | 6.1057 | 0.3072 | 159 | 165 | 6  | 3.3  |
| O-31 | 71  | 35 | 0 | 12.06 | 1 | 4.14 | 6.1057 | 0.3072 | 159 | 189 | 30 | 15.6 |
| O-32 | 71  | 50 | 0 | 12.06 | 1 | 4.14 | 7.3327 | 0.3447 | 202 | 197 | 5  | 2.6  |
| O-33 | 71  | 75 | 0 | 12.06 | 1 | 4.14 | 9.3777 | 0.4072 | 282 | 273 | 9  | 3.4  |
| O-34 | 117 | 50 | 0 | 12.06 | 1 | 4.14 | 7.3327 | 0.3447 | 202 | 228 | 26 | 11.4 |
| O-35 | 44  | 50 | 0 | 12.06 | 1 | 4.14 | 7.3327 | 0.3447 | 202 | 208 | 6  | 2.9  |
| O-36 | 95  | 35 | 0 | 12.15 | 1 | 4.14 | 6.1057 | 0.3072 | 161 | 154 | 7  | 4.3  |
| O-37 | 51  | 50 | 0 | 12.15 | 1 | 4.14 | 7.3327 | 0.3447 | 204 | 213 | 9  | 4.4  |

#### Series P

|     |         |    |   |       |   |      |        |        |     |       |    |      |
|-----|---------|----|---|-------|---|------|--------|--------|-----|-------|----|------|
| P-1 | 45.6122 | 35 | 0 | 11.7  | 1 | 4.14 | 6.1057 | 0.3072 | 155 | 120   | 35 | 28.9 |
| P-2 | 47.8571 | 35 | 0 | 11.3  | 1 | 4.14 | 6.1057 | 0.3072 | 149 | 134   | 15 | 11.5 |
| P-3 | 58.6735 | 35 | 0 | 12.65 | 1 | 4.14 | 6.1057 | 0.3072 | 167 | 126.5 | 41 | 32.3 |
| P-4 | 63.6735 | 35 | 0 | 12.45 | 1 | 4.14 | 6.1057 | 0.3072 | 165 | 128.5 | 36 | 28.1 |
| P-5 | 69.5918 | 35 | 0 | 9.1   | 1 | 4.14 | 6.1057 | 0.3072 | 120 | 145   | 25 | 17.0 |
| P-6 | 111.837 | 35 | 0 | 14.4  | 1 | 4.14 | 6.1057 | 0.3072 | 190 | 143.5 | 47 | 32.7 |
| P-7 | 125.714 | 35 | 0 | 13.9  | 1 | 4.14 | 6.1057 | 0.3072 | 184 | 199   | 15 | 7.6  |

#### Series Q

|     |      |    |   |      |   |      |        |        |     |     |    |      |
|-----|------|----|---|------|---|------|--------|--------|-----|-----|----|------|
| Q-1 | 75.3 | 50 | 0 | 10.8 | 1 | 4.14 | 7.3327 | 0.3447 | 181 | 201 | 20 | 10.0 |
| Q-2 | 55.8 | 50 | 0 | 11.7 | 1 | 4.14 | 7.3327 | 0.3447 | 196 | 187 | 9  | 4.8  |

|     |      |    |   |       |   |      |        |        |     |     |    |      |
|-----|------|----|---|-------|---|------|--------|--------|-----|-----|----|------|
| Q-3 | 64.4 | 50 | 0 | 10.89 | 1 | 4.14 | 7.3327 | 0.3447 | 182 | 229 | 47 | 20.3 |
| Q-4 | 62.9 | 50 | 0 | 11.88 | 1 | 4.14 | 7.3327 | 0.3447 | 199 | 193 | 6  | 3.1  |
| Q-5 | 54.7 | 50 | 0 | 12.78 | 1 | 4.14 | 7.3327 | 0.3447 | 214 | 274 | 60 | 21.9 |
| Q-6 | 82.5 | 50 | 0 | 9.72  | 1 | 4.14 | 7.3327 | 0.3447 | 163 | 219 | 56 | 25.6 |
| Q-7 | 65.1 | 50 | 0 | 11.07 | 1 | 4.14 | 7.3327 | 0.3447 | 185 | 223 | 38 | 16.8 |
